# Supplementary material
Source: publisher figshare collection journal article supplement (https://rs.figshare.com/ndownloader/files/12403409)

**A**

protein coding genes

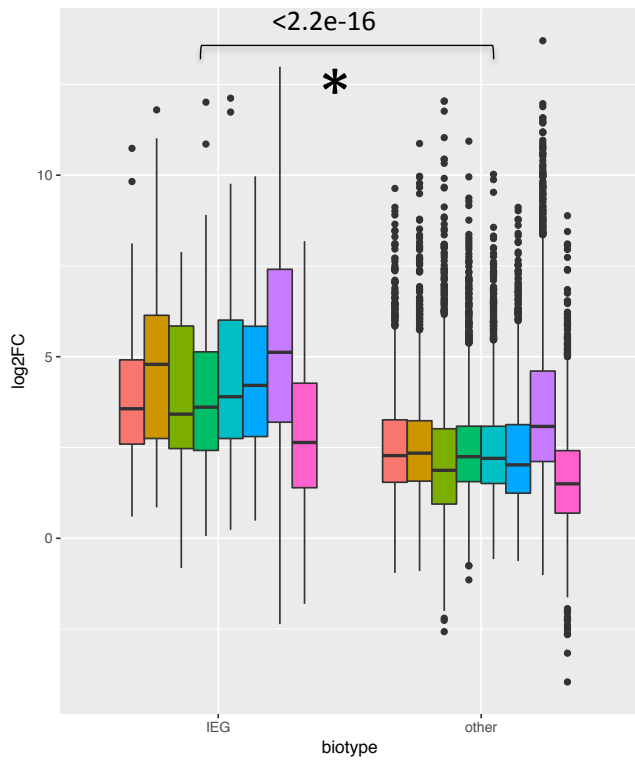**B**

non coding genes

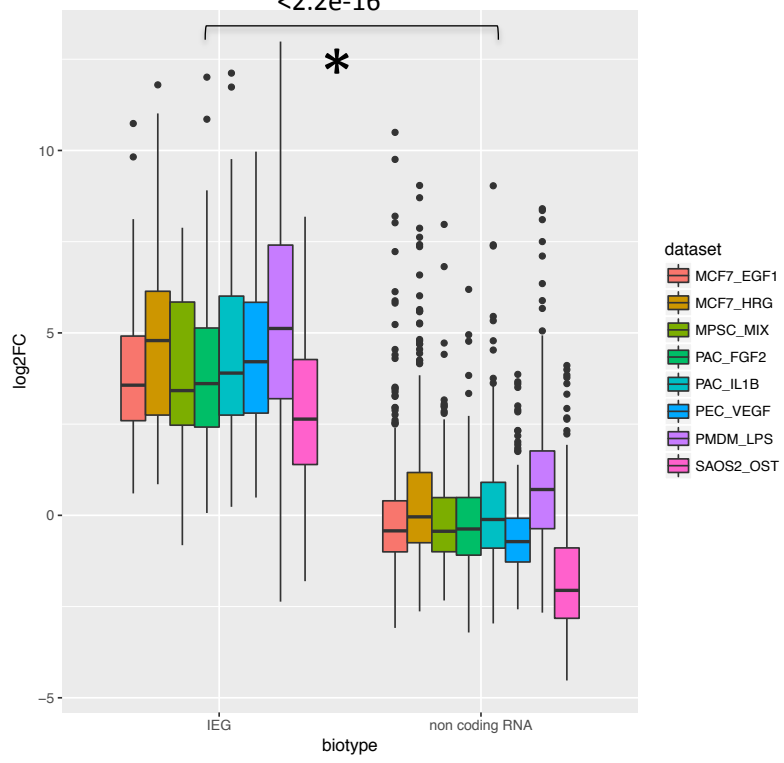**C**

protein coding genes

0.89

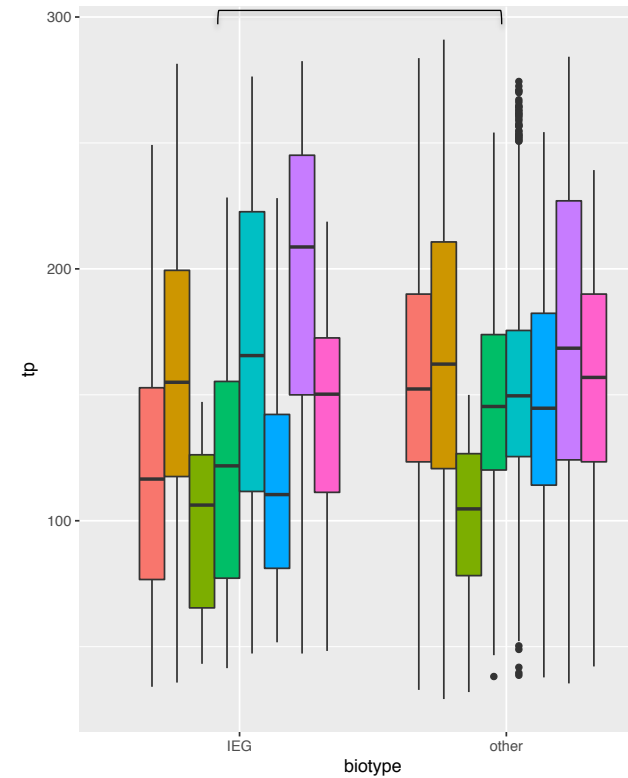**D**

non coding genes

 $<2.2e-16$ 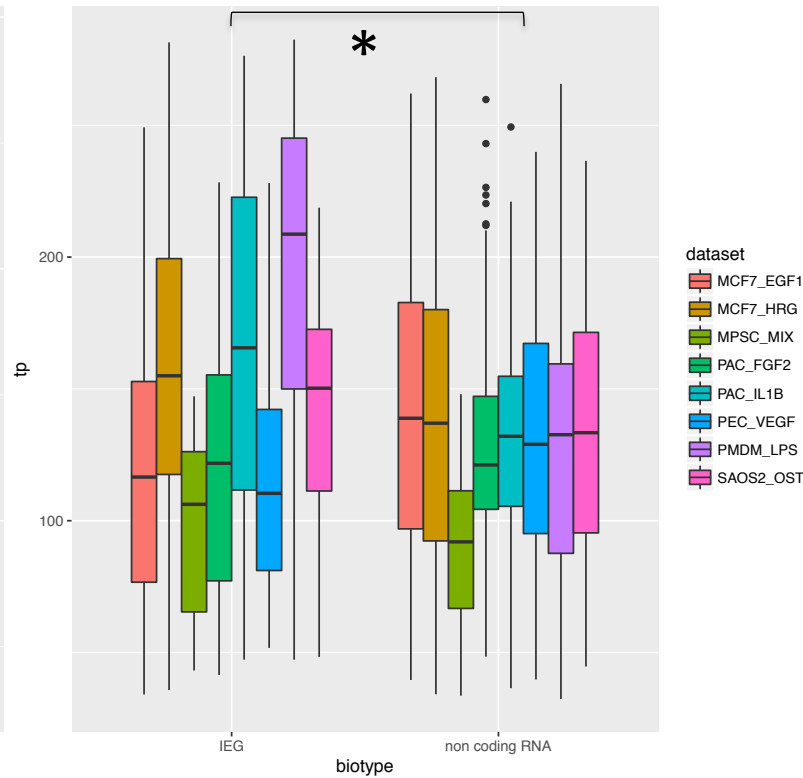

Supplement: Supplementary file [file 12403409]
